# Supplementary material for: Polyaspartamide Functionalized Catechol-Based Hydrogels Embedded with Silver Nanoparticles for Antimicrobial Properties
Source: MDPI journal article supplement (doi:10.3390/polym10111188), 2018-10-25
Supplement: s1 [file s1]

## Supplementary Information

### Polyaspartamide functionalized catechol-based hydrogels embedded with silver nanoparticles for antimicrobial properties

Milene Tan<sup>1</sup>, Youngjin Choi<sup>2</sup>, Jaeyun Kim<sup>2</sup>, Ji-Heung Kim<sup>2</sup>, Katharina M. Fromm<sup>1</sup>

<sup>1</sup>University of Fribourg, Department of Chemistry, Chemin du Musée, 9. 1700 Fribourg, Switzerland;

<sup>2</sup>School of Chemical Engineering, Sungkyunkwan University, Suwon 440–746, Republic of Korea

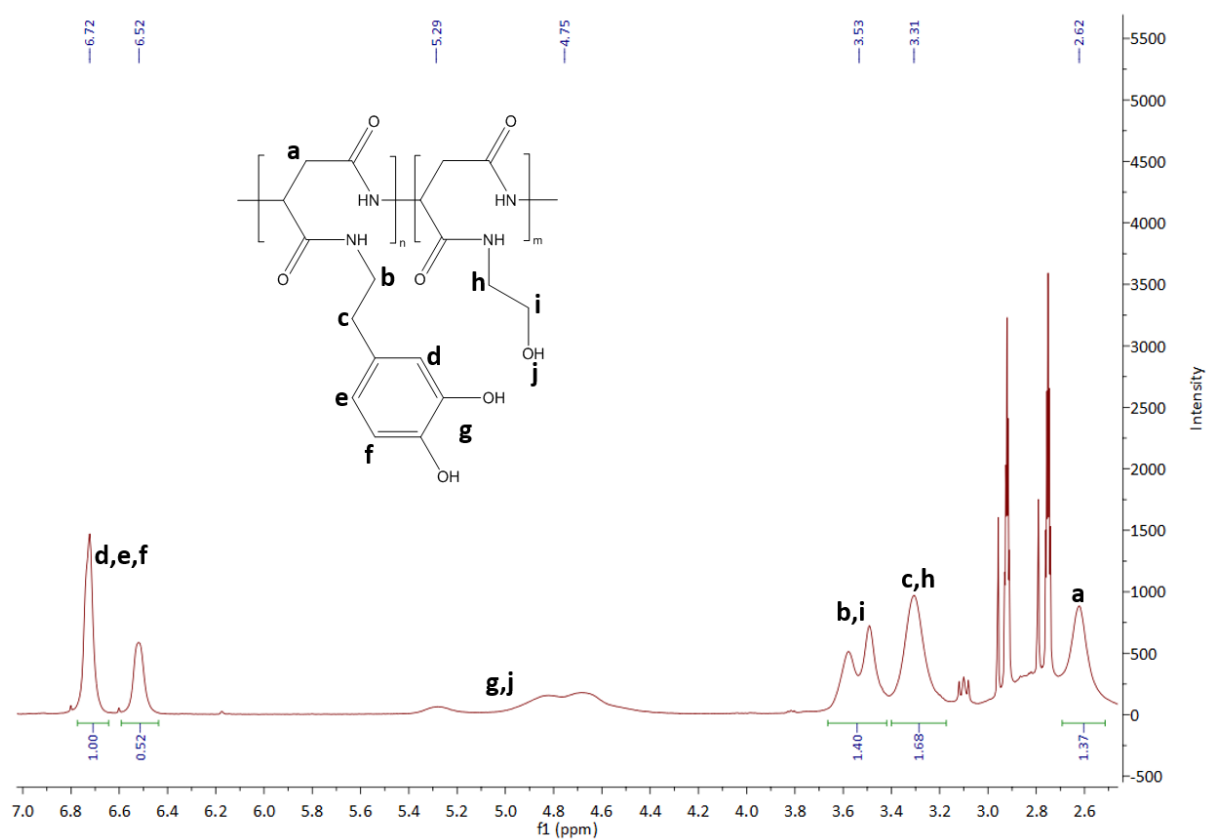

Figure S1 <sup>1</sup>H-NMR of the dopamine-conjugated polyAspAm derivative

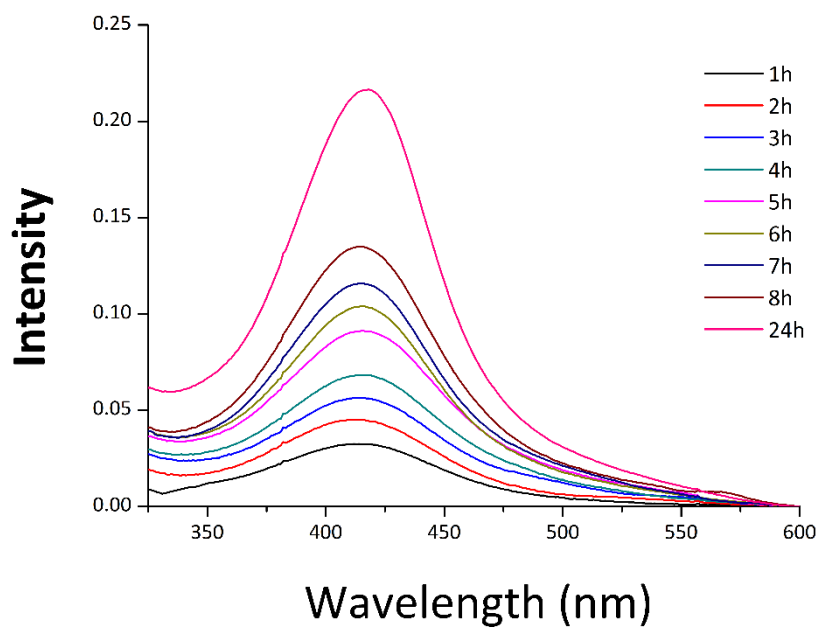

Figure S2 UV-vis analyses of the surrounding solution over time for sample A
